# Supplementary material for: Impact of organic nitrates on urban ozone production
Source: Copernicus journal article supplement (doi:10.5194/acp-11-4085-2011), 2011-05-04
Supplement: Supplementary file 1 [file acp-11-4085-2011-supplement.pdf]

Figure S1. Relative contribution to total OH reactivity (a), of observed VOCs to calculated OH reactivity (b) and alkyl nitrate production (c,d) in the afternoon (12pm – 6pm) demonstrate that despite a small contribution to OH reactivity, high-branching ratio species contribute significantly to ANs production, which will act to remove NO<sub>x</sub> and HO<sub>x</sub>, suppressing O<sub>3</sub> formation in this system. Organic nitrate production from aromatic VOCs is highly uncertain, and the result is thus bracketed by lower and upper extremes for aromatic branching ratios (see text).

a) Contributions to total OH reactivity

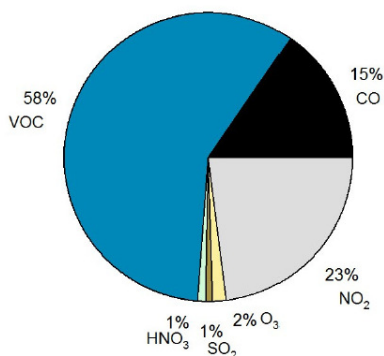

b) VOC contributions to OH reactivity

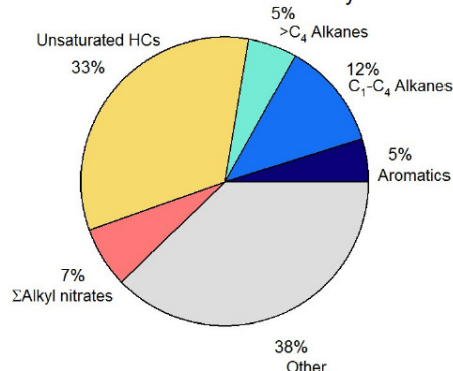

c) VOC contributions to AN production (low aromatic branching ratio)

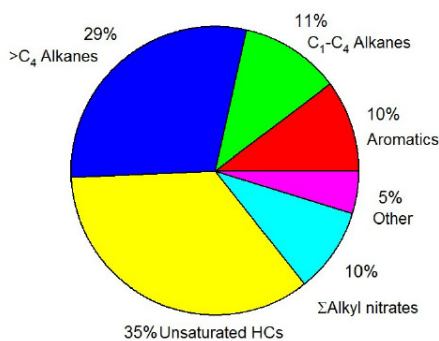

d) VOC contributions to AN production (high aromatic branching ratio)

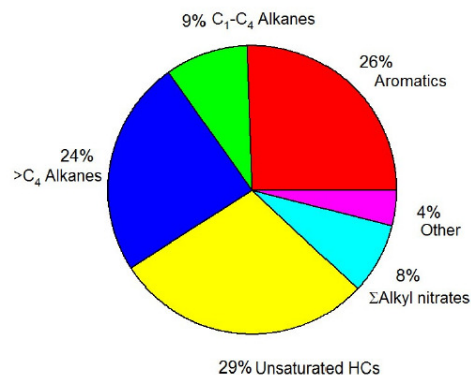

Table S1. Speciated ANs precursors observed and estimated for Tecamac, MX during MILAGRO with average afternoon concentration (ppb), branching ratio, rate constant ( $s^{-1}$ ), and relative contributions to ANs and  $O_3$  production (see text).

| Species       | Mixing Ratio (ppb) | $\alpha$ | $k_{OH+VOC}$ ( $molec^{-1} cm^3 s^{-1}$ ) | $P_{ANs}$ ( $s^{-1}$ ) | $P_{O_3}$ ( $s^{-1}$ ) |
|---------------|--------------------|----------|-------------------------------------------|------------------------|------------------------|
| Methane       | 1903               | 0.005    | $6.08E-15^{(1)}$                          | 0.0011                 | 0.42                   |
| Ethane        | 2.2                | 0.014    | $2.34E-13^{(1)}$                          | 0.00019                | 0.026                  |
| Ethene        | 1.4                | 0.0086   | $8.61E-12^{(1)}$                          | 0.0026                 | 0.61                   |
| Ethyne        | 2.1                | 0.0086   | $8.07E-13^{(2)}$                          | 0.00037                | 0.084                  |
| Propane       | 5.7                | 0.036    | $1.07E-12^{(1)}$                          | 0.0055                 | 0.29                   |
| Propene       | 0.42               | 0.015    | $2.66E-11^{(3)}$                          | 0.0050                 | 0.65                   |
| i-butane      | 0.77               | 0.02     | $2.31E-12^{(4)}$                          | 0.00088                | 0.086                  |
| n-Butane      | 2.2                | 0.077    | $2.51E-12^{(2)}$                          | 0.011                  | 0.26                   |
| n-Pentane     | 0.46               | 0.129    | $3.91E-12^{(3)}$                          | 0.0042                 | 0.057                  |
| i-Pentane     | 0.78               | 0.058    | $3.90E-12^{(3)}$                          | 0.0036                 | 0.12                   |
| n-Hexane      | 0.25               | 0.223    | $5.61E-12^{(5)}$                          | 0.0065                 | 0.045                  |
| n-Heptane     | 0.073              | 0.28     | $7.15E-12^{(2)}$                          | 0.0029                 | 0.015                  |
| Cis-2-butene  | 0.020              | 0.037    | $5.70E-11^{(4)}$                          | 0.00067                | 0.035                  |
| Cis-2-pentene | 0.0097             | 0.05     | $6.50E-11^{(2)}$                          | 0.00057                | 0.021                  |
| Methanol      | 3.8                | 0        | $9.04E-13^{(1)}$                          | 0                      | 0.14                   |
| 1-butene      | 0.040              | 0.025    | $3.17E-11^{(3)}$                          | 0.00056                | 0.043                  |

|                      |                     |       |                         |          |         |
|----------------------|---------------------|-------|-------------------------|----------|---------|
| 1-pentene            | 0.023               | 0.05  | 3.18E-11 <sup>(3)</sup> | 0.00068  | 0.026   |
| 2-methyl-1-butene    | 0.022               | 0.03  | 6.10E-11 <sup>(6)</sup> | 0.00083  | 0.054   |
| 3-methyl-1-butene    | 0.0055              | 0.025 | 3.22E-11 <sup>(6)</sup> | 8.25E-05 | 0.0064  |
| Trans-2-butene       | 0.019               | 0.03  | 6.48E-11 <sup>(2)</sup> | 0.00080  | 0.052   |
| Trans-2-pentene      | 0.021               | 0.05  | 6.70E-11 <sup>(2)</sup> | 0.0012   | 0.046   |
| 2-methyl-2-butene    | 0.024               | 0.05  | 8.79E-11 <sup>(6)</sup> | 0.0068   | 0.26    |
| 2-methyl-propene     | 0.14                | 0.02  | 5.20E-11 <sup>**</sup>  | 0.0027   | 0.27    |
| Acetaldehyde         | 1.88                | 0     | 1.39E-11 <sup>(1)</sup> | 0        | 1.17    |
| Formaldehyde         | 4.56                | 0     | 8.39E-12 <sup>(1)</sup> | 0        | 0.049   |
| Acetone              | 3.18                | 0     | 1.42E-13 <sup>(7)</sup> | 0        | 0.022   |
| CO                   | 270                 | 0     | 2.19E-13 <sup>(1)</sup> | 0        | 1.95    |
| Total Alkyl nitrates | 0.66                | 0.05  | 1.60E-11 <sup>(2)</sup> | 0.016    | 0.60    |
| Benzene              | 0.98                | 0.05  | 1.27E-12 <sup>(4)</sup> | 0.0015   | 0.057   |
| Toluene              | 0.90                | 0.08  | 6.21E-12 <sup>(4)</sup> | 0.010    | 0.24    |
| C8-benzenes          | 0.39                | 0.08  | 7.50E-12 <sup>(8)</sup> | 0.003792 | 0.087   |
| C9-benzenes          | 0.10                | 0.08  | 7.50E-12 <sup>(8)</sup> | 0.00083  | 0.019   |
| C10-benzenes         | 0.039               | 0.08  | 7.50E-12 <sup>(8)</sup> | 0.00031  | 0.0072  |
| C11-benzenes         | 0.013               | 0.08  | 7.50E-12 <sup>(8)</sup> | 1.13e-05 | 0.00026 |
| Butadiene            | 0.016 <sup>*</sup>  | 0.07  | 6.73E-11 <sup>(3)</sup> | 0.0014   | 0.038   |
| 1-hexene             | 0.0057 <sup>*</sup> | 0.07  | 3.70E-11 <sup>(2)</sup> | 0.00028  | 0.0074  |
| Propyne              | 0.058 <sup>*</sup>  | 0.01  | 2.97E-12 <sup>(9)</sup> | 0.000033 | 0.0065  |
| 2,2-dimethylbutane   | 0.20 <sup>*</sup>   | 0.2   | 2.32E-12 <sup>(2)</sup> | 0.0017   | 0.014   |
| Cyclopentane         | 0.05 <sup>*</sup>   | 0.1   | 5.08E-12 <sup>(2)</sup> | 0.00048  | 0.0086  |

|                            |                    |       |                          |         |        |
|----------------------------|--------------------|-------|--------------------------|---------|--------|
| 2,3-dimethyl butane        | 0.17 <sup>*</sup>  | 0.14  | 2.32E-12 <sup>(10)</sup> | 0.00048 | 0.0058 |
| 2-methyl pentane           | 0.32 <sup>*</sup>  | 0.14  | 5.20E-12 <sup>(5)</sup>  | 0.0045  | 0.055  |
| 3-methyl pentane           | 0.20 <sup>*</sup>  | 0.14  | 5.70E-12 <sup>(11)</sup> | 0.0030  | 0.037  |
| Methylcyclopentane         | 0.044 <sup>*</sup> | 0.15  | 6.00E-12 <sup>(10)</sup> | 0.00075 | 0.0085 |
| Cyclohexane                | 0.089 <sup>*</sup> | 0.17  | 7.49E-12 <sup>(3)</sup>  | 0.0021  | 0.021  |
| 2-methylhexane             | 0.18 <sup>*</sup>  | 0.15  | 7.00E-12 <sup>(10)</sup> | 0.0035  | 0.040  |
| 2,3-dimethylpentane        | 0.026 <sup>*</sup> | 0.15  | 7.00E-12 <sup>(10)</sup> | 0.00051 | 0.0058 |
| 3-methylhexane             | 0.14 <sup>*</sup>  | 0.18  | 7.00E-12 <sup>(10)</sup> | 0.0033  | 0.031  |
| i-octane                   | 0.15 <sup>*</sup>  | 0.25  | 8.70E-12 <sup>(10)</sup> | 0.0062  | 0.037  |
| Methylcyclohexane          | 0.019 <sup>*</sup> | 0.17  | 1.04E-11 <sup>(2)</sup>  | 0.00065 | 0.0063 |
| 2,5-dimethylhexane         | 0.016 <sup>*</sup> | 0.19  | 9.00E-12 <sup>(10)</sup> | 0.00053 | 0.0045 |
| 2,4-dimethylhexane         | 0.069 <sup>*</sup> | 0.19  | 9.00E-12 <sup>(10)</sup> | 0.0022  | 0.019  |
| 2,3,4-trimethylpentane     | 0.054 <sup>*</sup> | 0.18  | 9.00E-12 <sup>(10)</sup> | 0.0017  | 0.015  |
| N-octane                   | 0.040 <sup>*</sup> | 0.226 | 8.68E-12 <sup>(2)</sup>  | 0.0015  | 0.010  |
| Nonane                     | 0.035 <sup>*</sup> | 0.05  | 1.02E-11 <sup>(2)</sup>  | 0.00034 | 0.013  |
| n-decane                   | 0.050 <sup>*</sup> | 0.3   | 1.6E-11 <sup>(2)</sup>   | 0.0033  | 0.015  |
| 2-methylheptane            | 0.026 <sup>*</sup> | 0.25  | 9.00E-12 <sup>(10)</sup> | 0.0011  | 0.0065 |
| 1,2,4-trimethylcyclohexane | 0.013 <sup>*</sup> | 0.2   | 1.00E-11 <sup>(10)</sup> | 0.0005  | 0.004  |
| MTBE                       | 2.5 <sup>*</sup>   | 0.041 | 3.11E-12 <sup>(12)</sup> | 0.0060  | 0.28   |
| Styrene                    | 0.24 <sup>*</sup>  | 0.1   | 5.80E-11 <sup>(2)</sup>  | 0.026   | 0.47   |
| Total                      |                    | 0.036 |                          | 0.16    | 8.98   |

\* Mixing ratios for several compounds were estimated based on Dunlea et al. (10).

1. Sander, SP, et al. (2006) Chemical kinetics and photochemical data for use in atmospheric studies, Evaluation Number 15 in JPL Publication 06-2. *Jet Propulsion Laboratory*.
2. Rosen, RS, et al. (2004) Observations of total alkyl nitrates during Texas Air Quality Study 2000: Implications for O<sub>3</sub> and alkyl nitrate photochemistry. *J Geophys Res* 109: D07303, doi:10.1029/2003JD004227.
3. Atkinson, R, et al. (1992) Evaluated Kinetic and Photochemical Data for Atmospheric Chemistry Supplement-IV - IUPAC Subcommittee on Gas Kinetic Data Evaluation for Atmospheric Chemistry. *J Phys Chem Ref Data* 21: 1125-1568.
4. Atkinson, R (1986) Kinetics and Mechanisms of the Gas-Phase Reactions of the Hydroxyl Radical with Organic-Compounds under Atmospheric Conditions. *Chem Rev* 86: 69-201.
5. Atkinson, R (2003) Kinetics of the gas-phase reactions of OH radicals with alkanes and cycloalkanes. *Atmos Chem Phys* 3: 2233-2307.
6. Atkinson, R (2000) Atmospheric chemistry of VOCs and NO<sub>x</sub>. *Atmos Environ* 34: 2063-2101.
7. Yamada, T, Taylor, PH, Goumri, A, Marshall, P (2003) The reaction of OH with acetone and acetone-d(6) from 298 to 832 K: Rate coefficients and mechanism. *J Chem Phys* 119: 10600-10606.
8. Baulch, DL, et al. (1992) Evaluated Kinetic Data for Combustion Modeling. *J Phys Chem Ref Data* 21: 411-734.
9. Boodaghians, RB, Hall, IW, Toby, FS, Wayne, RP (1987) Absolute Determinations of the Kinetics and Temperature Dependences of the Reactions of OH with a Series of Alkynes. *J Chem Soc, Faraday Trans* 83: 2073-2080.
10. Dunlea, EJ, et al. (2007) Evaluation of nitrogen dioxide chemiluminescence monitors in a polluted urban environment. *Atmos Chem Phys* 7: 2691-2704.
11. Atkinson, R (1994) Gas-Phase Tropospheric Chemistry of Organic-Compounds. *J Phys Chem Ref Data*: R1-&.
12. Arif, M, Dellinger, B, Taylor, PH (1997) Rate coefficients of hydroxyl radical reaction with dimethyl ether and methyl tert-butyl ether over an extended temperature range. *J Phys Chem A* 101: 2436-2441.
